# Supplementary material for: Ultrahigh-photoresponsive UV photodetector based on a BP/ReS2 heterostructure p–n diode
Source: Royal Society of Chemistry journal article supplement (doi:10.1039/c8nr05291c), 2018-01-01
Supplement: c8nr05291c1.pdf [file c8nr05291c1.pdf]

# Supplementary Information

## Ultrahigh Photoresponsivity UV Photodetector Based on BP/ReS<sub>2</sub> Heterostructure p-n Diode

*Shiwei Cao<sup>1,2</sup>, Yanhui Xing<sup>1</sup>, Jun Han<sup>1</sup>, Xin Luo<sup>2</sup>, Wenxing Lv<sup>2</sup>, Weiming Lv<sup>2</sup>, Baoshun*

*Zhang<sup>2</sup>, and Zhongming Zeng<sup>2</sup>*

<sup>1</sup>Key Lab of Opto-electronics Technology, Ministry of Education, College of Microelectronics,  
Beijing University of Technology, Beijing 100124, P. R. China.

<sup>2</sup>Key Laboratory of Nanodevices and Applications, Suzhou Institute of Nano-tech and Nano-  
bionics, Chinese Academy of Sciences, Ruoshui Road 398, Suzhou 215123, China

CORRESPONDING AUTHOR

[xingyanhui@bjut.edu.cn](mailto:xingyanhui@bjut.edu.cn), [zmzeng2012@sinano.ac.cn](mailto:zmzeng2012@sinano.ac.cn)

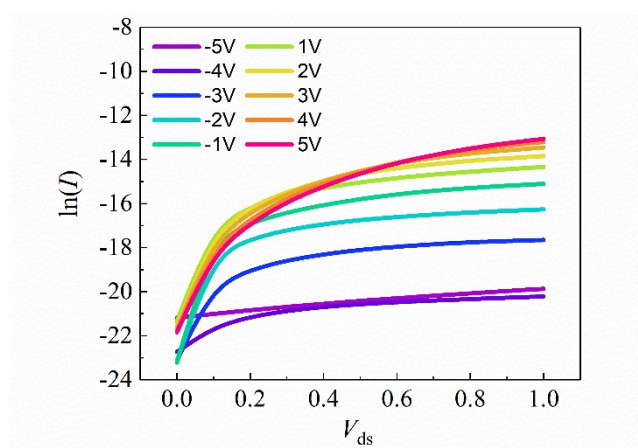

**Figure S1** The  $\ln(I)$  versus  $V_{ds}$  plot for extracting the device ideality factor.

The diode ideality factor can be calculated from a plot of the logarithmic output characteristics at the forward bias based on the following equation:

$$I = I_{sat} \left[ \exp\left(\frac{qV}{nk_B T}\right) - 1 \right]$$

Where  $I$  is the diode current,  $V$  is the applied voltage,  $I_{sat}$  is reverse saturation current,  $n$  is the ideality factor,  $T$  is the temperature,  $q$  is elementary charge, and  $k_B$  is the Boltzmann's constant.

For voltage greater than a few  $k_B T$  (e.g.,  $> 0.1V$ ), the “ $- 1$ ” term in the above equation can be equation gives the following equation:

$$\ln(I) = \ln(I_{sat}) + \left(\frac{q}{nk_B T}\right)V$$

When plotting the natural logarithm of the diode current *versus* the applied voltage based on the above equation, the slope gives  $q/nk_B T$ .

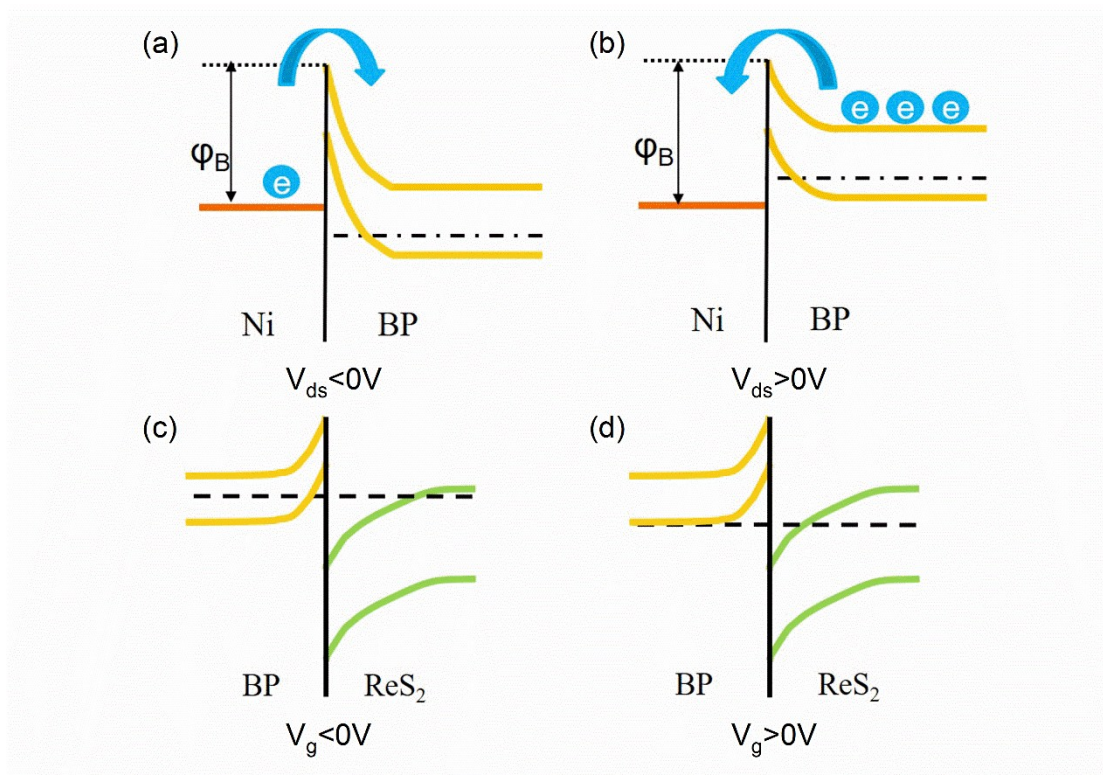

**Figure S2** Energy band diagrams of the Ni/BP junction at (a) negative and (b) positive bias voltage. Schematics of the band alignments when (c) negative and (d) positive back gate voltage

is applied.

**Table S1.** Comparison of the key parameters of our device to the reported BP and ReS<sub>2</sub>-based photodetectors.

| Material                                  | Measurement condition |           |                |                              | Responsivity                 | Reference |
|-------------------------------------------|-----------------------|-----------|----------------|------------------------------|------------------------------|-----------|
|                                           | $V_{ds}$ (V)          | $V_g$ (V) | $\lambda$ (nm) | $P$                          | $R$ (A/W)                    |           |
| ReS <sub>2</sub> /MoS <sub>2</sub>        | 2                     | 0         | 532            | 30.6 $\mu$ W/cm <sup>2</sup> | 35.07                        | 1         |
| ReS <sub>2</sub>                          | 1                     | 0         | 532            | 0.56 mW/cm <sup>2</sup>      | 0.98                         | 2         |
| ReS <sub>2</sub> hexagon                  | 0.5                   | 0         | 500            | 3.11 mW/cm <sup>2</sup>      | 604                          | 3         |
| ReS <sub>2</sub> (lateral PN)             | -2                    | 0         | 660            | 3.11 mW/cm <sup>2</sup>      | 0.14                         | 4         |
| ReS <sub>2</sub> (O <sub>2</sub> -plasma) | 5                     | 30        | 405            | 5 pW                         | 2.5 $\times$ 10 <sup>7</sup> | 5         |
| ReS <sub>2</sub>                          | 2.1                   | 50        | 633            | 25 nW                        | 16.14                        | 6         |
| ReS <sub>2</sub>                          | 4                     | -50       | 532            | 6 pW                         | 88600                        | 7         |
| BP-on-WSe <sub>2</sub>                    | 0.5                   | 0         | 637            | 1 mW/cm <sup>2</sup>         | 10 <sup>3</sup>              | 8         |
| BP/MoS <sub>2</sub>                       | 3                     | 0         | 532            | 1 nW                         | 22.3                         | 9         |
| BP/MoS <sub>2</sub>                       | 2                     | 0         | 633            | 1 $\mu$ W                    | 3.54                         | 10        |
| BP                                        | 0.3                   | -4        | 3390           | 16.5 W/cm <sup>2</sup>       | 82                           | 11        |
| BP/OTS                                    | -0.1                  | -40       | 520            | 0.5 mW/cm <sup>2</sup>       | 1.4 $\times$ 10 <sup>4</sup> | 12        |
| WS <sub>2</sub> /BP                       | 5                     | 0         | 532            | 44.2 mW/cm <sup>2</sup>      | 120m                         | 13        |
| BP/Graphene                               | 1                     | 0         | 1550           | 11 nW                        | 3.3 $\times$ 10 <sup>3</sup> | 14        |
| BP/ReS <sub>2</sub>                       | 1                     | 0         | 365            | 0.55 mW/cm <sup>2</sup>      | 4120                         | This work |

## REFERENCES

- 1 M. Zhao, W. Zhang, M. Liu, C. Zou, K. Yang, Y. Yang, Y. Dong, L. Zhang and S. Huang, *Nano Res.*, 2016, **9**, 3772-3780.
- 2 J.-K. Qin, W.-Z. Shao, Y. Li, C.-Y. Xu, D.-D. Ren, X.-G. Song and L. Zhen, *Rsc. Adv.*, 2017, **7**, 24188-24194.
- 3 M. Hafeez, L. Gan, H. Li, Y. Ma and T. Zhai, *Adv. Funct. Mater.*, 2016, **26**, 4551-4560.
- 4 M. Najmzadeh, C. Ko, K. Wu, S. Tongay and J. Wu, *Appl. Phys. Express*, 2016, **9**, 055201.
- 5 J. Shim, A. Oh, D. H. Kang, S. Oh, S. K. Jang, J. Jeon, M. H. Jeon, M. Kim, C. Choi, J. Lee, S. Lee, G. Y. Yeom, Y. J. Song and J. H. Park, *Adv. Mater.*, 2016, **28**, 6985-6992.
- 6 E. Zhang, Y. Jin, X. Yuan, W. Wang, C. Zhang, L. Tang, S. Liu, P. Zhou, W. Hu and F. Xiu, *Adv. Funct. Mater.*, 2015, **25**, 4076-4082.
- 7 E. Liu, M. Long, J. Zeng, W. Luo, Y. Wang, Y. Pan, W. Zhou, B. Wang, W. Hu, Z. Ni, Y. You, X. Zhang, S. Qin, Y. Shi, K. Watanabe, T. Taniguchi, H. Yuan, H. Y. Hwang, Y. Cui, F. Miao and D. Xing, *Adv. Funct. Mater.*, 2016, **26**, 1938-1944.
- 8 L. Ye, P. Wang, W. Jin Luo, F. Gong, L. Liao, T. Liu, L. Tong, J. Zang, J. Xu and W. Hu, *Nano Energy*, 2017, **37**, 53-60.
- 9 L. Ye, H. Li, Z. Chen and J. Xu, *ACS Photonics*, 2016, **3**, 692-699.
- 10 Y. Deng, Z. Luo, N. J. Conrad, H. Liu, Y. Gong, S. Najmaei, P. M. Ajayan, J. Lou, X. Xu and P. D. Ye, *ACS Nano*, 2014, **8**, 8292-8299.
- 11 Q. Guo, A. Pospischil, M. Bhuiyan, H. Jiang, H. Tian, D. Farmer, B. Deng, C. Li, S. J. Han, H. Wang, Q. Xia, T. P. Ma, T. Mueller and F. Xia, *Nano Lett.*, 2016, **16**, 4648-4655.
- 12 D.-H. Kang, M. H. Jeon, S. K. Jang, W.-Y. Choi, K. N. Kim, J. Kim, S. Lee, G. Y. Yeom and J.-H. Park, *ACS Photonics*, 2017, **4**, 1822-1830.
- 13 Z. Jia, J. Xiang, C. Mu, F. Wen, R. Yang, C. Hao and Z. Liu, *J. Mater. Sci.*, 2017, **52**, 11506-11512.
- 14 Y. Liu, B. N. Shivananju, Y. Wang, Y. Zhang, W. Yu, S. Xiao, T. Sun, W. Ma, H. Mu, S. Lin, H. Zhang, Y. Lu, C. W. Qiu, S. Li and Q. Bao, *ACS Appl. Mater. Inter.*, 2017, **9**, 36137-36145.
